# Supplementary material
Source: PubMed Central journal article supplement (PMC4414702)
Supplement: NIHMS652548-supplement-2.pdf [file NIHMS652548-supplement-2.pdf]

**Table S2. Baseline Characteristics of Adults on In-Center Hemodialysis With and Without Infection During Follow-Up**

|                                    | <b>No Infection-Related Hospitalization<br/>N=80395</b> | <b>Infection-Related Hospitalization<br/>N=60270</b> | <b>p-value</b> |
|------------------------------------|---------------------------------------------------------|------------------------------------------------------|----------------|
| Age, years                         | 65.4 ± 14.8                                             | 65.5 ± 14.8                                          | 0.08           |
| Body Mass Index, kg/m2 *           | 28.5 ± 7.8                                              | 29 ± 8.3                                             | <.001          |
| MDRD eGFR , ml/min/1.73m2*         | 10.9 ± 5.6                                              | 11.4 ± 5.8                                           | <.001          |
| Sex, Male                          | 45238 (56)                                              | 31135 (52)                                           | <.001          |
| Race                               |                                                         |                                                      | <.001          |
| White                              | 52632 (65)                                              | 39084 (65)                                           |                |
| Black                              | 23915 (30)                                              | 18558 (31)                                           |                |
| Asian                              | 2213 (3)                                                | 1310 (2)                                             |                |
| Pacific Islander                   | 545 (0.7)                                               | 372 (0.6)                                            |                |
| American Indian or Alaskan Native  | 853 (1)                                                 | 713 (1)                                              |                |
| Multi-Racial or Other**            | 237 (0.3)                                               | 233 (0.4)                                            |                |
| Hispanic                           | 9749 (12)                                               | 7969 (13)                                            | <.001          |
| Diabetes                           | 45909 (57)                                              | 38167 (63)                                           | <.001          |
| ASHD                               | 18649 (23)                                              | 14722 (24)                                           | <.001          |
| Cerebrovascular Disease            | 8208 (10)                                               | 7159 (12)                                            | <.001          |
| Peripheral Vascular Disease        | 12065 (15)                                              | 10385 (17)                                           | <.001          |
| Congestive Heart Failure           | 28067 (35)                                              | 23705 (39)                                           | <.001          |
| History of Amputation              | 2329 (3)                                                | 2470 (4)                                             | <.001          |
| Hypertension                       | 71359 (89)                                              | 52927 (88)                                           | <.001          |
| Cancer                             | 5917 (7)                                                | 4475 (7)                                             | 0.64           |
| COPD                               | 7294 (9)                                                | 6715 (11)                                            | <.001          |
| Initial Access Type                |                                                         |                                                      | <.001          |
| AVF                                | 13099 (16)                                              | 6283 (10)                                            |                |
| Graft                              | 3819 (5)                                                | 2723 (5)                                             |                |
| Catheter                           | 62105 (77)                                              | 50310 (83)                                           |                |
| Other                              | 972 (1)                                                 | 759 (1)                                              |                |
| Missing                            | 400 (0.5)                                               | 195 (0.3)                                            |                |
| Inability to Ambulate or Transfer  | 4771 (6)                                                | 5482 (9)                                             | <.001          |
| Institutionalization               |                                                         |                                                      | <.001          |
| None                               | 75150 (93)                                              | 54275 (90)                                           |                |
| Nursing home                       | 4387 (5)                                                | 5216 (9)                                             |                |
| Assisted living                    | 533 (0.7)                                               | 501 (0.8)                                            |                |
| Other                              | 325 (0.4)                                               | 278 (0.5)                                            |                |
| Dual Medicare/Medicaid Eligibility | 29760 (37)                                              | 25679 (43)                                           | <.001          |
| Prior Nephrology Care              |                                                         |                                                      | <.001          |

|                                                                                                                                                                                                 |            |            |       |
|-------------------------------------------------------------------------------------------------------------------------------------------------------------------------------------------------|------------|------------|-------|
| <6 months                                                                                                                                                                                       | 8506 (11)  | 6084 (10)  |       |
| 6-12 months                                                                                                                                                                                     | 19381 (24) | 14401 (24) |       |
| > 12 months                                                                                                                                                                                     | 19806 (25) | 12751 (21) |       |
| None                                                                                                                                                                                            | 23688 (29) | 19245 (32) |       |
| Unknown                                                                                                                                                                                         | 9014 (11)  | 7789 (13)  |       |
| Albumin, g/dl                                                                                                                                                                                   |            |            | <.001 |
| < 2.5                                                                                                                                                                                           | 9884 (12)  | 9368 (16)  |       |
| 2.5 - < 3.0                                                                                                                                                                                     | 12792 (16) | 10620 (18) |       |
| 3.0 - < 3.5                                                                                                                                                                                     | 17133 (21) | 12638 (21) |       |
| 3.5 - < 4.0                                                                                                                                                                                     | 14533 (18) | 9498 (16)  |       |
| ≥4                                                                                                                                                                                              | 7541 (9)   | 3805 (6)   |       |
| Missing                                                                                                                                                                                         | 18512 (23) | 14341 (24) |       |
| Tobacco Use, Current                                                                                                                                                                            | 5203 (6)   | 3912 (6)   | 0.89  |
| Region                                                                                                                                                                                          |            |            | <.001 |
| Northeast                                                                                                                                                                                       | 11930 (15) | 9794 (16)  |       |
| South                                                                                                                                                                                           | 36207 (45) | 27242 (45) |       |
| Midwest                                                                                                                                                                                         | 18157 (23) | 14038 (23) |       |
| West                                                                                                                                                                                            | 14101 (18) | 9196 (15)  |       |
| *Baseline values prior to multiple imputation; ** Unknown race classified as other                                                                                                              |            |            |       |
| MDRD eGFR Modification of Diet in Renal Disease estimated glomerular filtration rate; ASHD atherosclerotic heart disease; COPD chronic obstructive pulmonary disease; AVF arteriovenous fistula |            |            |       |
