# Supplementary material
Source: PubMed Central journal article supplement (PMC4414702)
Supplement: NIHMS652548-supplement-3.pdf [file NIHMS652548-supplement-3.pdf]

**Table S3. Baseline Characteristics Associated with 30-Day Hospital Readmission or Death Prior to Readmission**

|                                                   | Hospital Readmission<br>OR (95% CI) | Death without<br>Readmission<br>OR (95% CI) |
|---------------------------------------------------|-------------------------------------|---------------------------------------------|
| Age, years                                        |                                     |                                             |
| 18 – 44                                           | 1.02 (0.95, 1.09)                   | 0.46 (0.34, 0.61)                           |
| 45 – 64                                           | Ref.                                | Ref.                                        |
| 65 – 74                                           | 1.07 (1.02, 1.13)                   | 1.91 (1.68, 2.18)                           |
| 75 – 84                                           | 1.11 (1.05, 1.18)                   | 3.11 (2.72, 3.54)                           |
| ≥ 85                                              | 1.08 (0.99, 1.18)                   | 3.86 (3.26, 4.56)                           |
| Male                                              | 0.92 (0.88, 0.95)                   | 0.96 (0.88, 1.05)                           |
| Race                                              |                                     |                                             |
| White                                             | Ref                                 | Ref                                         |
| Black                                             | 1.02 (0.97, 1.07)                   | 0.71 (0.63, 0.79)                           |
| Asian                                             | 0.81 (0.71, 0.93)                   | 0.56 (0.40, 0.77)                           |
| Other                                             | 0.84 (0.74, 0.96)                   | 0.44 (0.29, 0.68)                           |
| Hispanic Ethnicity                                | 0.86 (0.81, 0.91)                   | 0.59 (0.50, 0.70)                           |
| Medicare/Medicaid Dual Eligibility                | 1.11 (1.07, 1.16)                   | 0.98 (0.88, 1.08)                           |
| Region                                            |                                     |                                             |
| Northeast                                         | Ref                                 | Ref                                         |
| South                                             | 0.89 (0.84, 0.94)                   | 1.39 (1.23, 1.59)                           |
| Midwest                                           | 0.93 (0.88, 0.99)                   | 1.30 (1.13, 1.49)                           |
| West                                              | 0.86 (0.80, 0.92)                   | 1.24 (1.05, 1.45)                           |
| MDRD eGFR, per 5 ml/min/1.73m <sup>2</sup> higher | 1.07 (1.05, 1.08)                   | 1.09 (1.05, 1.13)                           |
| Albumin, g/dL                                     |                                     |                                             |
| < 2.5                                             | 1.16 (1.09, 1.25)                   | 1.24 (1.05, 1.46)                           |
| 2.5 – <3.0                                        | 1.12 (1.05, 1.20)                   | 1.17 (1.01, 1.35)                           |
| 3.0 – <3.5                                        | 1.10 (1.03, 1.16)                   | 1.13 (0.99, 1.29)                           |
| 3.5 – <4.0                                        | Ref                                 | Ref                                         |
| ≥ 4                                               | 0.98 (0.90, 1.07)                   | 1.02 (0.84, 1.23)                           |
| Initial Vascular Access Type                      |                                     |                                             |
| AVF                                               | Ref                                 | Ref                                         |
| Graft                                             | 1.10 (0.99, 1.23)                   | 0.91 (0.71, 1.18)                           |
| Dialysis Catheter                                 | 1.09 (1.02, 1.16)                   | 1.13 (0.98, 1.32)                           |
| Other                                             | 1.11 (0.93, 1.32)                   | 1.04 (0.69, 1.56)                           |

|                                                                                                                                  |                   |                   |
|----------------------------------------------------------------------------------------------------------------------------------|-------------------|-------------------|
| BMI, kg/m <sup>2</sup>                                                                                                           |                   |                   |
| < 18.5                                                                                                                           | 1.12 (1.01, 1.24) | 1.43 (1.17, 1.74) |
| 18.5 – <25                                                                                                                       | 1.06 (1.01, 1.12) | 1.13 (1.01, 1.25) |
| 25 – <30                                                                                                                         | Ref               | Ref               |
| ≥ 30                                                                                                                             | 0.90 (0.85, 0.94) | 0.89 (0.79, 0.99) |
| Diabetes Mellitus                                                                                                                | 1.06 (1.01, 1.10) | 1.06 (0.97, 1.17) |
| Atherosclerotic Heart Disease                                                                                                    | 1.01 (0.97, 1.06) | 0.98 (0.89, 1.09) |
| Cerebrovascular Disease                                                                                                          | 0.97 (0.92, 1.03) | 1.07 (0.95, 1.21) |
| Peripheral Vascular Disease                                                                                                      | 1.05 (0.99, 1.11) | 1.17 (1.05, 1.31) |
| Heart Failure                                                                                                                    | 1.08 (1.03, 1.12) | 1.24 (1.13, 1.35) |
| History of Amputation                                                                                                            | 1.01 (0.92, 1.11) | 0.99 (0.79, 1.24) |
| Hypertension                                                                                                                     | 0.92 (0.87, 0.98) | 0.85 (0.75, 0.97) |
| Cancer                                                                                                                           | 1.11 (1.03, 1.20) | 1.18 (1.03, 1.36) |
| COPD                                                                                                                             | 1.14 (1.07, 1.21) | 0.97 (0.85, 1.10) |
| Inability to Ambulate or Transfer                                                                                                | 1.13 (1.05, 1.22) | 1.30 (1.13, 1.49) |
| Current Tobacco Use                                                                                                              | 1.04 (0.97, 1.12) | 0.92 (0.75, 1.13) |
| Institutionalization at Dialysis Initiation                                                                                      |                   |                   |
| None                                                                                                                             | Ref               | Ref               |
| Assisted Living                                                                                                                  | 0.94 (0.77, 1.16) | 1.13 (0.77, 1.65) |
| Nursing Home                                                                                                                     | 1.03 (0.95, 1.10) | 1.43 (1.25, 1.64) |
| Other                                                                                                                            | 0.86 (0.65, 1.14) | 1.34 (0.79, 2.27) |
| Nephrology Care Prior to Dialysis                                                                                                |                   |                   |
| >12months                                                                                                                        | Ref               | Ref               |
| 6-12 months                                                                                                                      | 1.12 (1.06, 1.18) | 1.14 (1.01, 1.30) |
| < 6 months                                                                                                                       | 1.13 (1.05, 1.21) | 1.15 (0.99, 1.35) |
| None                                                                                                                             | 1.15 (1.09, 1.21) | 1.20 (1.06, 1.36) |
| Unknown                                                                                                                          | 1.22 (1.14, 1.30) | 1.15 (0.99, 1.35) |
| COPD chronic obstructive pulmonary disease; MDRD eGFR Modification of Diet in Renal Disease estimated glomerular filtration rate |                   |                   |
